# Supplementary material for: Analysis of Landscape Character Assessment and Cultural Ecosystem Services Evaluation Frameworks for Peri-Urban Landscape Planning: A Case Study of Harku Municipality, Estonia
Source: MDPI journal article supplement (doi:10.3390/land12101825), 2023-09-25
Supplement: s1 [file s1]

| Natural Environment Types (NETs) | Contact Types (CTs) |         |            |                |        |               |         |             |             |         |          |          |         |           |                      |                           |                    |                 |                                |           |                          |                     |           |
|----------------------------------|---------------------|---------|------------|----------------|--------|---------------|---------|-------------|-------------|---------|----------|----------|---------|-----------|----------------------|---------------------------|--------------------|-----------------|--------------------------------|-----------|--------------------------|---------------------|-----------|
|                                  | RESTORATIVE         |         |            |                |        |               |         |             |             |         |          |          |         |           | SOCIAL               |                           |                    |                 | COGNITIVE                      |           |                          |                     |           |
|                                  | Physical            |         |            |                |        | Psychological |         |             |             |         |          |          |         |           | Community & Cohesion |                           |                    |                 | Spiritual, historic & symbolic |           | Aesthetic perceptio<br>n | Science & Education |           |
|                                  | Sporting            | Playing | Recreation | Experienc<br>e | Skills | Stress relief | Resting | Restoration | Self-esteem | Privacy | Security | Memories | Calming | Curiosity | Events               | Providing gathering place | Sense of community | Social cohesion | Ornamental                     | Spiritual | Aesthetic                | Food production     | Education |
| PARKS                            |                     |         |            |                |        |               |         |             |             |         |          |          |         |           |                      |                           |                    |                 |                                |           |                          |                     |           |
| forest parks                     | 3                   | 2.4     | 2.8        | 3              | 3      | 2.8           | 2.8     | 2.8         | 2.8         | 3       | 2.4      | 2.8      | 2.8     | 2.8       | 2.2                  | 2                         | 2.2                | 2.2             | 2.4                            | 3         | 2.8                      | 2                   | 2.8       |
| nature parks                     | 3                   | 3       | 2.8        | 3              | 3      | 2.8           | 2.8     | 3           | 2.8         | 2.8     | 2.4      | 2.8      | 2.8     | 2.8       | 2.2                  | 2                         | 2.2                | 2.2             | 2.4                            | 3         | 2.8                      | 2                   | 2.8       |
| manor parks                      | 2.8                 | 2.8     | 2.8        | 2.8            | 2.8    | 2.6           | 2.6     | 2.6         | 2.6         | 2.6     | 2.4      | 2.6      | 2.6     | 2.6       | 2.6                  | 2.6                       | 2.6                | 2.6             | 3                              | 3         | 3                        | 1.4                 | 2.8       |
| municipal parks                  | 3                   | 2.8     | 2.8        | 2.8            | 2.8    | 2.4           | 2.6     | 2.6         | 2.8         | 2.2     | 2.4      | 2.6      | 2.4     | 2.6       | 2.8                  | 2.8                       | 2.8                | 2.8             | 2.6                            | 2.6       | 2.8                      | 1.2                 | 2.8       |
| average                          | 3.0                 | 2.8     | 2.8        | 2.9            | 2.9    | 2.7           | 2.7     | 2.8         | 2.8         | 2.7     | 2.4      | 2.7      | 2.7     | 2.7       | 2.5                  | 2.4                       | 2.5                | 2.5             | 2.6                            | 2.9       | 2.9                      | 1.7                 | 2.8       |
| GARDENS                          |                     |         |            |                |        |               |         |             |             |         |          |          |         |           |                      |                           |                    |                 |                                |           |                          |                     |           |
| family house private gardens     | 0.8                 | 2.4     | 2.4        | 2.6            | 2.6    | 2.8           | 2.6     | 2.6         | 2.8         | 3       | 3        | 2.6      | 2.8     | 2.8       | 2.2                  | 2.2                       | 2.4                | 2.8             | 3                              | 3         | 2.8                      | 2.6                 | 2.4       |
| block house gardens              | 1.4                 | 2.4     | 2.4        | 2.6            | 2.6    | 2.8           | 2.6     | 2.6         | 2.8         | 2.6     | 2.8      | 2.6      | 2.8     | 2.8       | 2.6                  | 2.6                       | 2.8                | 2.8             | 3                              | 3         | 2.8                      | 2.2                 | 2.4       |
| schoolyard gardens               | 1.4                 | 2.4     | 2.4        | 2.6            | 2.6    | 3             | 2.6     | 2.6         | 2.8         | 2.8     | 2.8      | 2.6      | 2.8     | 2.8       | 2.8                  | 2.8                       | 2.8                | 3               | 3                              | 3         | 2.8                      | 2.4                 | 3         |
| orchards                         | 0.6                 | 2       | 2          | 2.6            | 2.6    | 2.4           | 2.2     | 2.4         | 2.4         | 2.4     | 2.4      | 2.4      | 2.4     | 2.4       | 2                    | 2.2                       | 2.4                | 2.4             | 2.8                            | 2.6       | 3                        | 3                   | 2.6       |
| community gardens                | 0.8                 | 2       | 2          | 2.6            | 2.6    | 2.8           | 2.4     | 2.6         | 2.8         | 2.8     | 2.8      | 2.6      | 2.8     | 2.8       | 2.8                  | 3                         | 3                  | 3               | 3                              | 2.8       | 2.8                      | 2.8                 | 2.6       |
| average                          | 1.0                 | 2.2     | 2.2        | 2.6            | 2.6    | 2.8           | 2.5     | 2.6         | 2.7         | 2.7     | 2.8      | 2.6      | 2.7     | 2.7       | 2.5                  | 2.6                       | 2.7                | 2.8             | 3.0                            | 2.9       | 2.8                      | 2.6                 | 2.6       |
| GREEN LANDSCAPE ELEMENTS         |                     |         |            |                |        |               |         |             |             |         |          |          |         |           |                      |                           |                    |                 |                                |           |                          |                     |           |
| brushwood lots                   | 0.8                 | 1.2     | 1.4        | 1.4            | 1.4    | 1.6           | 1.6     | 1.6         | 1.6         | 2       | 1.4      | 1.6      | 1.4     | 1.4       | 0.8                  | 1.2                       | 1.4                | 1.2             | 1.6                            | 1.4       | 1.8                      | 1                   | 1.4       |
| wood groves                      | 0.8                 | 1.2     | 1.4        | 1.4            | 1.4    | 1.6           | 1.6     | 1.6         | 1.6         | 2       | 1.4      | 1.6      | 1.6     | 1.6       | 0.8                  | 1.2                       | 1.4                | 1.2             | 1.6                            | 1.6       | 1.6                      | 1                   | 1.4       |
| informal green spaces            | 2                   | 2.2     | 2.2        | 2.2            | 2.2    | 2             | 2       | 2           | 2           | 2.2     | 2.2      | 2        | 2       | 2         | 1.4                  | 1.6                       | 1.6                | 1.6             | 1.8                            | 1.8       | 2.2                      | 0.6                 | 2         |
| formal green spaces              | 2.8                 | 2.8     | 2.8        | 2.8            | 2.8    | 2.8           | 2.8     | 2.8         | 2.8         | 2.2     | 2.8      | 2.8      | 2.8     | 2.8       | 2.6                  | 2.6                       | 2.6                | 2.6             | 2.2                            | 2.2       | 2.4                      | 0.6                 | 2.4       |
| average                          | 1.6                 | 1.9     | 2.0        | 2.0            | 2.0    | 2.0           | 2.0     | 2.0         | 2.0         | 2.1     | 2.0      | 2.0      | 2.0     | 2.0       | 1.4                  | 1.7                       | 1.8                | 1.7             | 1.8                            | 1.8       | 2.0                      | 0.8                 | 1.8       |
| GREEN LANDSCAPE MATRIX           |                     |         |            |                |        |               |         |             |             |         |          |          |         |           |                      |                           |                    |                 |                                |           |                          |                     |           |
| commercial forests               | 2.8                 | 2.8     | 2.8        | 2.8            | 2.8    | 2.8           | 2.8     | 2.8         | 2.8         | 2.8     | 2.6      | 2.8      | 2.8     | 2.8       | 1.4                  | 1.4                       | 1.4                | 1.4             | 2.4                            | 2.4       | 3                        | 2.4                 | 2         |
| agriculture lands                | 0.4                 | 0.4     | 0.6        | 0.8            | 0.8    | 1             | 1       | 1           | 1           | 0.8     | 1        | 1.2      | 1       | 1         | 0.6                  | 0.6                       | 0.8                | 0.8             | 1.8                            | 1.8       | 2.6                      | 2.6                 | 2         |
| grasslands                       | 1.2                 | 1       | 1.2        | 1.2            | 1.2    | 1.8           | 1.8     | 1.8         | 1.8         | 1.6     | 1.8      | 1.8      | 1.8     | 1.8       | 2                    | 2                         | 1.2                | 2               | 2.2                            | 2.2       | 2.8                      | 2.4                 | 2         |
| average                          | 1.5                 | 1.4     | 1.5        | 1.6            | 1.6    | 1.9           | 1.9     | 1.9         | 1.9         | 1.7     | 1.8      | 1.9      | 1.9     | 1.9       | 1.3                  | 1.3                       | 1.1                | 1.4             | 2.1                            | 2.1       | 2.8                      | 2.5                 | 2.0       |
| BARRIERS                         |                     |         |            |                |        |               |         |             |             |         |          |          |         |           |                      |                           |                    |                 |                                |           |                          |                     |           |
| green buffers                    | 1.4                 | 1.4     | 1.4        | 1.6            | 1.4    | 2.4           | 2.4     | 2.4         | 2.2         | 2.4     | 2.4      | 2.4      | 2.6     | 2.4       | 1                    | 1.2                       | 1.2                | 1.2             | 2.2                            | 2.2       | 2.6                      | 0.4                 | 2.4       |
| green corridors                  | 1.8                 | 1.8     | 1.8        | 1.8            | 1.6    | 2.4           | 2.4     | 2.4         | 2.2         | 2.4     | 2.4      | 2.4      | 2.6     | 2.4       | 1.2                  | 1.4                       | 1.4                | 1.4             | 2.2                            | 2.2       | 2.6                      | 0.4                 | 2.4       |
| cliffs                           | 1.8                 | 1.4     | 2          | 1.8            | 1.6    | 2.8           | 2.8     | 2.8         | 2.4         | 2.6     | 2.4      | 2.6      | 2.8     | 2.8       | 1.8                  | 1.8                       | 2                  | 2.2             | 2.8                            | 2.8       | 3                        | 0.2                 | 2.6       |
| roads                            | 1.8                 | 0.8     | 1.8        | 2              | 1.8    | 2             | 2       | 2           | 2.2         | 1.8     | 1.6      | 2.2      | 2       | 2.4       | 0.8                  | 0.8                       | 0.8                | 1               | 1.4                            | 1.4       | 2                        | 0                   | 1.2       |
| coastal zone                     | 1.8                 | 1.6     | 2          | 1.8            | 1.6    | 2.8           | 2.8     | 2.8         | 2           | 2.6     | 2.8      | 2.6      | 2.8     | 2.8       | 1.8                  | 1.8                       | 2.2                | 2.4             | 2.8                            | 2.8       | 3                        | 0.2                 | 2.6       |
| settlements                      | 2                   | 2.3     | 2          | 2              | 2      | 2.3           | 2.3     | 2.3         | 2           | 2       | 1.6      | 2.3      | 2       | 2.3       | 3                    | 3                         | 3                  | 3               | 2                              | 2         | 2                        | 1                   | 1.6       |
| average                          | 1.8                 | 1.6     | 1.8        | 1.8            | 1.7    | 2.5           | 2.5     | 2.5         | 2.2         | 2.3     | 2.2      | 2.4      | 2.5     | 2.5       | 1.6                  | 1.7                       | 1.8                | 1.9             | 2.2                            | 2.2       | 2.5                      | 0.4                 | 2.1       |
| BLUE SPACES                      |                     |         |            |                |        |               |         |             |             |         |          |          |         |           |                      |                           |                    |                 |                                |           |                          |                     |           |
| sea                              | 3                   | 2.8     | 3          | 2.8            | 2.8    | 2.6           | 3       | 2.6         | 2.4         | 2.2     | 1.8      | 2.6      | 2.6     | 2.6       | 2.2                  | 2.2                       | 2.4                | 2.2             | 3                              | 3         | 3                        | 1.4                 | 2.6       |
| bogs                             | 1.6                 | 1.6     | 3          | 2.4            | 2.2    | 2.6           | 3       | 2.6         | 2.4         | 2.6     | 1.8      | 2.4      | 2.6     | 2.4       | 1.2                  | 1.2                       | 1.2                | 1.4             | 2.6                            | 2.6       | 2.8                      | 0.8                 | 2.6       |
| rivers                           | 2.2                 | 1.8     | 2.6        | 2.4            | 2.2    | 2.6           | 2.6     | 2.6         | 2.4         | 2.2     | 1.8      | 2.6      | 2.6     | 2.6       | 1.4                  | 1.4                       | 1.6                | 1.6             | 2.8                            | 2.8       | 3                        | 1                   | 2.6       |
| lakes                            | 1.8                 | 2       | 2.5        | 1.8            | 2      | 2.5           | 2.5     | 2.5         | 2.3         | 2       | 1.5      | 2.5      | 2.5     | 2.5       | 2                    | 2                         | 2                  | 2               | 3                              | 3         | 2.8                      | 1.2                 | 2.5       |
| ponds                            | 1                   | 1.2     | 2.2        | 2              | 1.8    | 2.2           | 2       | 2           | 2           | 2       | 1.4      | 2        | 2       | 1.8       | 0.8                  | 0.8                       | 0.8                | 1.2             | 1.8                            | 1.8       | 2.8                      | 0.8                 | 2.6       |
| waterfalls                       | 0.6                 | 1       | 3          | 1.8            | 1.6    | 2.4           | 2.2     | 2.2         | 2.2         | 2       | 1.6      | 2.2      | 2.2     | 2.2       | 1.4                  | 1.6                       | 1.6                | 1.8             | 2.6                            | 2.6       | 3                        | 0.4                 | 2.6       |
| average                          | 1.7                 | 1.7     | 2.7        | 2.2            | 2.1    | 2.5           | 2.6     | 2.4         | 2.3         | 2.2     | 1.7      | 2.4      | 2.4     | 2.4       | 1.5                  | 1.5                       | 1.6                | 1.7             | 2.6                            | 2.6       | 2.9                      | 0.9                 | 2.6       |
| ACTIVITY AREAS                   |                     |         |            |                |        |               |         |             |             |         |          |          |         |           |                      |                           |                    |                 |                                |           |                          |                     |           |
| public playgrounds               | 2.4                 | 2.8     | 2.2        | 2.8            | 2.8    | 2.6           | 2.4     | 2.6         | 2.4         | 1.8     | 2.4      | 2.6      | 2.4     | 2.4       | 2.4                  | 2.4                       | 2.6                | 2.6             | 2                              | 2.2       | 2.2                      | 0                   | 1.2       |
| block house playgrounds          | 2.4                 | 2.8     | 2.2        | 2.8            | 2.8    | 2.6           | 2.4     | 2.6         | 2.4         | 1.8     | 2.4      | 2.6      | 2.4     | 2.4       | 2.2                  | 2.2                       | 2.4                | 2.6             | 2                              | 2.2       | 2.2                      | 0                   | 1.8       |
| sports fields                    | 2.8                 | 2.8     | 2.2        | 2.8            | 2.8    | 2.6           | 2.4     | 2.4         | 2.4         | 1.8     | 2.6      | 2.6      | 2.4     | 2.4       | 2.8                  | 2.8                       | 2.4                | 2.6             | 1.8                            | 1.8       | 2.4                      | 0                   | 2         |
| outdoor gyms                     | 2.8                 | 2.8     | 2.4        | 2.8            | 2.8    | 2.6           | 2.4     | 2.4         | 2.4         | 2       | 2.4      | 2.6      | 2.4     | 2.4       | 2.2                  | 2.2                       | 2.4                | 2.6             | 1.4                            | 1.6       | 2                        | 0                   | 1.2       |
| wheels parks                     | 2.8                 | 2.8     | 2.4        | 2.8            | 2.8    | 2.6           | 2.4     | 2.4         | 2.4         | 2       | 2.2      | 2.6      | 2.2     | 2.4       | 2.2                  | 2.2                       | 2.4                | 2.2             | 1.4                            | 1.6       | 2                        | 0                   | 1.2       |
| hiking trails                    | 2.8                 | 2.4     | 2.4        | 2.8            | 2.8    | 2.8           | 2.6     | 2.8         | 2.6         | 2.4     | 2.8      | 2.8      | 2.8     | 2.8       | 2.2                  | 2.4                       | 2.4                | 2.4             | 2.2                            | 2.2       | 2.6                      | 0.2                 | 2.6       |
| study trails                     | 2.6                 | 2.4     | 2.4        | 2.8            | 2.8    | 2.6           | 2.4     | 2.6         | 2.4         | 2.2     | 2.6      | 2.6      | 2.6     | 2.6       | 2.2                  | 2.4                       | 2.4                | 2.4             | 2.2                            | 2.2       | 2.6                      | 0.4                 | 3         |
| camping areas                    | 2                   | 2       | 2.4        | 2.8            | 2.6    | 2.8           | 2.8     | 2.8         | 2.6         | 2.2     | 2.4      | 2.8      | 2.8     | 2.8       | 2.4                  | 2.6                       | 2.6                | 2.6             | 2.4                            | 2.4       | 2.8                      | 0.4                 | 1.8       |
| beaches                          | 2.8                 | 2.8     | 3          | 3              | 2.8    | 3             | 3       | 3           | 2.8         | 2.2     | 2.6      | 3        | 3       | 3         | 3                    | 3                         | 2.8                | 3               | 3                              | 3         | 3                        | 0.4                 | 2.2       |
| average                          | 2.6                 | 2.6     | 2.4        | 2.8            | 2.8    | 2.7           | 2.5     | 2.6         | 2.5         | 2.0     | 2.5      | 2.7      | 2.6     | 2.6       | 2.4                  | 2.5                       | 2.5                | 2.6             | 2.0                            | 2.1       | 2.4                      | 0.2                 | 1.9       |
| MISCELLANEOUS TYPES              |                     |         |            |                |        |               |         |             |             |         |          |          |         |           |                      |                           |                    |                 |                                |           |                          |                     |           |
| cemeteries                       | 0                   | 0       | 1.4        | 1              | 0.8    | 1.8           | 1.8     | 1.6         | 1.6         | 2.6     | 2        | 3        | 1.8     | 2.2       |                      | 2.4                       | 2.6                | 2.6             | 3                              | 3         | 3                        | 0                   | 2.4       |
| churchyards                      | 0                   | 0       | 1.4        | 1              | 0.8    | 1.8           | 1.8     | 1.6         | 1.6         | 2       | 2        | 2.4      | 1.8     | 2.2       | 2.4                  | 2.4                       | 2.6                | 2.6             | 3                              | 2.8       | 3                        | 0                   | 2.4       |
| military land                    | 0.8                 | 0.8     | 1.4        | 1.4            | 1.2    | 1.4           | 1.6     | 1.4         | 1.4         | 1.8     | 1.6      | 2.4      | 1.6     | 2.4       | 1.6                  | 1.4                       | 1.4                | 1.4             | 1.6                            | 1.4       | 1                        | 0.2                 | 2.2       |
| vacant lots                      | 1                   | 1       | 1.2        | 0.8            | 0.8    | 0.8           | 0.8     | 0.8         | 1           | 1       | 1        | 1.2      | 1       | 1.2       | 1.2                  | 1.2                       | 0.8                | 1.2             | 0.8                            | 0.8       | 0.8                      | 0.4                 | 0.6       |
| quarries                         | 0                   | 0       | 0.2        | 0.2            | 0      | 0             | 0       | 0           | 0.2         | 0       | 0        | 0        | 0       | 0.4       | 0                    | 0                         | 0                  | 0.4             | 0.4                            | 0.2       | 0.2                      | 0                   | 0.6       |
| average                          | 0.4                 | 0.4     | 1.1        | 0.9            | 0.7    | 1.2           | 1.2     | 1.1         | 1.2         | 1.5     | 1.3      | 1.8      | 1.2     | 1.7       | 1.3                  | 1.5                       | 1.5                | 1.6             | 1.8                            | 1.6       | 1.6                      | 0.1                 | 1.6       |

|   |        |
|---|--------|
| 3 | high   |
| 2 | medium |
| 1 | low    |
