# Supplementary material for: Analysis of Landscape Character Assessment and Cultural Ecosystem Services Evaluation Frameworks for Peri-Urban Landscape Planning: A Case Study of Harku Municipality, Estonia
Source: MDPI journal article supplement (doi:10.3390/land12101825), 2023-09-25
Supplement: s1 [file s1]

| <b>Muraste (Area 1)</b> | <b>Restorative</b> | <b>Social</b> | <b>Cognitive</b> |
|-------------------------|--------------------|---------------|------------------|
| Block house playground  | 2.58               | 2.30          | 1.72             |
| Community garden        | 2.46               | 2.93          | 2.73             |
| Manor park              | 2.66               | 2.73          | 2.40             |
| Protected nature        | 2.84               | 2.33          | 2.53             |
| Public playground       | 2.58               | 2.30          | 1.72             |
| Agricultural land       | 0.86               | 1.07          | 2.40             |
| Grassland               | 1.56               | 1.93          | 2.40             |
| Settlements             | 2.10               | 2.67          | 1.53             |
| Private gardens         | 2.56               | 2.60          | 2.60             |
| Road                    | 1.89               | 1.03          | 1.07             |
| <i>AVERGAE</i>          | <b>2.21</b>        | <b>2.19</b>   | <b>2.11</b>      |
| <b>Ilmandu (Area 2)</b> |                    |               |                  |
| Agricultural land       | 0.86               | 1.07          | 2.40             |
| Grassland               | 1.56               | 1.93          | 2.40             |
| Settlements             | 2.10               | 2.67          | 1.53             |
| Private gardens         | 2.56               | 2.60          | 2.60             |
| Road                    | 1.89               | 1.03          | 1.07             |
| <i>AVERGAE</i>          | <b>1.79</b>        | <b>1.86</b>   | <b>2.00</b>      |
| <b>Liikva (Area 3)</b>  |                    |               |                  |
| Agricultural land       | 0.86               | 1.07          | 2.40             |
| Grassland               | 1.56               | 1.93          | 2.40             |
| Settlements             | 2.10               | 2.67          | 1.53             |
| Private gardens         | 2.56               | 2.60          | 2.60             |
| River                   | 2.37               | 1.93          | 2.20             |
| Orchard                 | 2.23               | 2.40          | 2.87             |
| Road                    | 1.89               | 1.03          | 1.07             |
| <i>AVERGAE</i>          | <b>1.94</b>        | <b>1.95</b>   | <b>2.15</b>      |
| <b>Vääna (Area 4)</b>   |                    |               |                  |
| Block house playground  | 2.58               | 2.30          | 1.72             |
| Community garden        | 2.46               | 2.93          | 2.73             |
| Manor park              | 2.66               | 2.73          | 2.40             |
| Orchard                 | 2.23               | 2.40          | 2.87             |
| Outdoor gym             | 2.58               | 2.30          | 1.72             |
| Sports field            | 2.58               | 2.30          | 1.72             |
| Agricultural land       | 0.86               | 1.07          | 2.40             |
| Grassland               | 1.56               | 1.93          | 2.40             |
| Settlements             | 2.10               | 2.67          | 1.53             |
| Private gardens         | 2.56               | 2.60          | 2.60             |
| River                   | 2.37               | 1.93          | 2.20             |
| Forest park             | 2.80               | 2.33          | 2.53             |
| Road                    | 1.89               | 1.03          | 1.07             |
| <i>AVERGAE</i>          | <b>2.25</b>        | <b>2.19</b>   | <b>2.15</b>      |
| <b>Kumna (Area 5)</b>   |                    |               |                  |
| Manor park              | 2.66               | 2.73          | 2.40             |
| Manor park              | 2.66               | 2.73          | 2.40             |
| Protected nature        | 2.84               | 2.33          | 2.53             |
| Protected nature        | 2.84               | 2.33          | 2.53             |
| Agricultural land       | 0.86               | 1.07          | 2.40             |
| Grassland               | 1.56               | 1.93          | 2.40             |

|                        |             |             |             |
|------------------------|-------------|-------------|-------------|
| Settlements            | 2.10        | 2.67        | 1.53        |
| Private gardens        | 2.56        | 2.60        | 2.60        |
| Forest park            | 2.80        | 2.33        | 2.53        |
| Road                   | 1.89        | 1.03        | 1.07        |
| <i>AVERGAE</i>         | <b>2.28</b> | <b>2.18</b> | <b>2.24</b> |
| <b>Harku (Area 6)</b>  |             |             |             |
| Block house garden     | 2.56        | 2.80        | 2.47        |
| Block house garden     | 2.56        | 2.80        | 2.47        |
| Block house garden     | 2.56        | 2.80        | 2.47        |
| Block house garden     | 2.56        | 2.80        | 2.47        |
| Block house garden     | 2.56        | 2.80        | 2.47        |
| Block house garden     | 2.56        | 2.80        | 2.47        |
| Block house garden     | 2.56        | 2.80        | 2.47        |
| Block house garden     | 2.56        | 2.80        | 2.47        |
| Block house garden     | 2.56        | 2.80        | 2.47        |
| Block house playground | 2.58        | 2.30        | 1.72        |
| Block house playground | 2.58        | 2.30        | 1.72        |
| Agricultural land      | 0.86        | 1.07        | 2.40        |
| Grassland              | 1.56        | 1.93        | 2.40        |
| Settlements            | 2.10        | 2.67        | 1.53        |
| Private gardens        | 2.56        | 2.60        | 2.60        |
| Forest park            | 2.80        | 2.33        | 2.53        |
| Road                   | 1.89        | 1.03        | 1.07        |
| <i>AVERGAE</i>         | <b>2.34</b> | <b>2.41</b> | <b>2.23</b> |
