# Supplementary figures and images for: Analysis of Landscape Character Assessment and Cultural Ecosystem Services Evaluation Frameworks for Peri-Urban Landscape Planning: A Case Study of Harku Municipality, Estonia
Source: MDPI journal article supplement (doi:10.3390/land12101825), 2023-09-25

Landscape Character Types (LCTs) - All scores

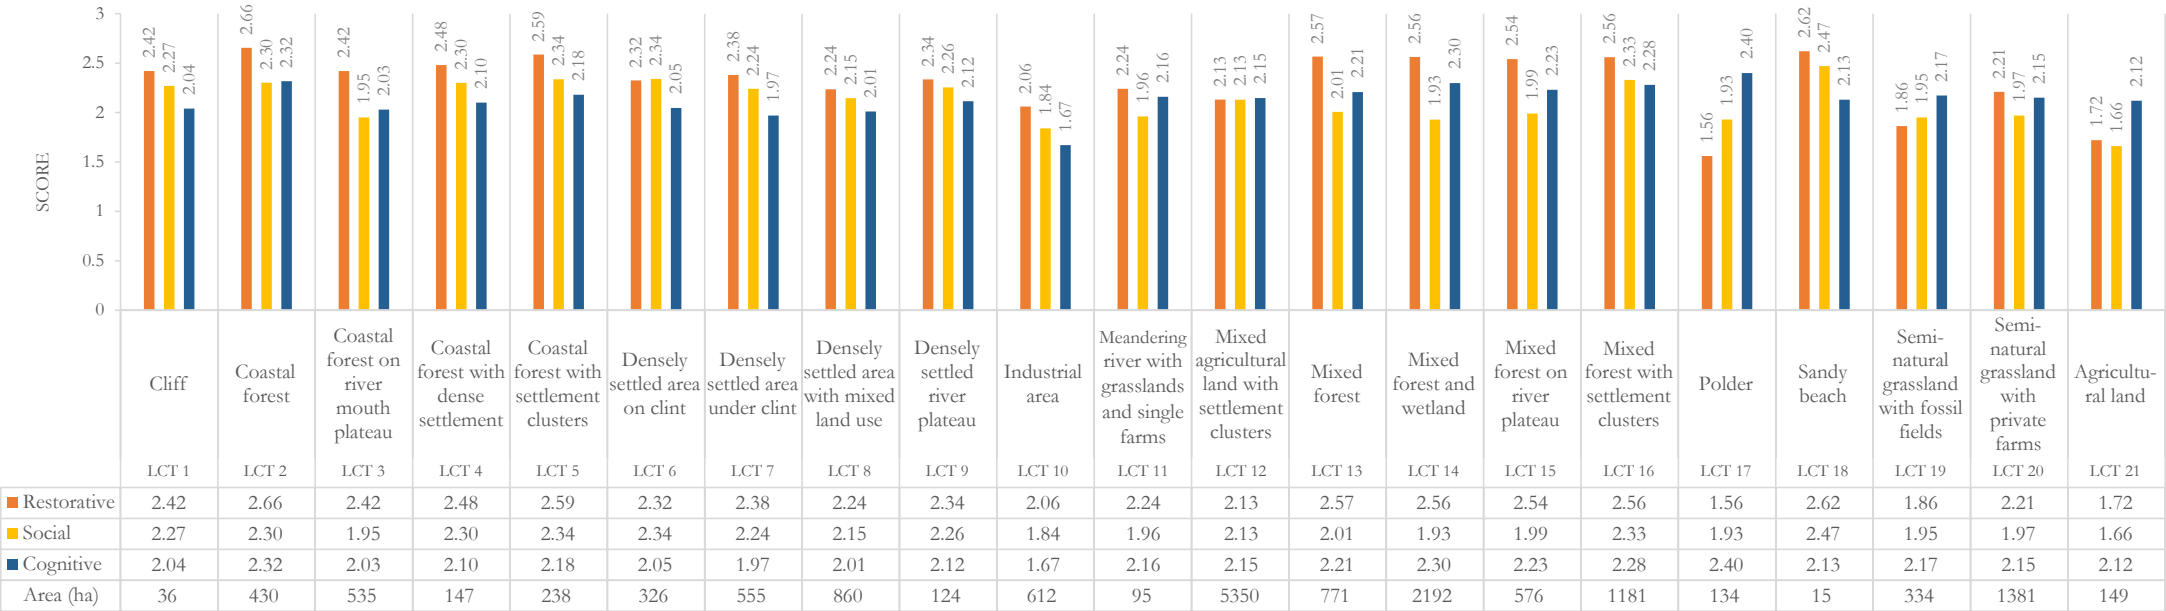

Score: 3 (high) - 0 (N/A)

Supplement: s1 [file s1]
